# Supplementary material
Source: publisher figshare collection journal article supplement (https://plos.figshare.com/articles/dataset/_/1095477)
Supplement: Supplementary file 1 [file 1 › Appendix_S1.pdf]

## Appendix S1

To find the evolutionarily stable strategy (ESS) of the defense strategist, we consider the defense strategist's net growth rate  $R_D$  (from Table 1B in article):

$$R_D = \alpha_{DN}N^* - \alpha_{PD}P^* - \delta_D = (1-S)^\tau \alpha_{CN}N^* - (1-S^\tau) \alpha_{PC}P^* - \delta_D \quad (1)$$

The first partial derivative of  $R_D$  with respect to  $S$  (i.e.  $\frac{\partial R_D}{\partial S}$ ) is:

$$\frac{\partial}{\partial S}[(1-S)^\tau \alpha_{CN}N^* - (1-S^\tau) \alpha_{PC}P^* - \delta_D] = -\tau(1-S)^{\tau-1} \alpha_{CN}N^* + \tau S^{\tau-1} \alpha_{PC}P^* \quad (2)$$

The second partial derivative of  $R_D$  with respect to  $S$  (i.e.  $\frac{\partial^2 R_D}{\partial S^2}$ ) is:

$$\frac{\partial}{\partial S}[-\tau(1-S)^{\tau-1} \alpha_{CN}N^* + \tau S^{\tau-1} \alpha_{PC}P^*] = \tau(\tau-1)(1-S)^{\tau-2} \alpha_{CN}N^* + \tau(\tau-1)S^{\tau-2} \alpha_{PC}P^* \quad (3)$$

The ESS for the defense strategist when all three populations (C, D, and P) are present is found analytically by setting the first partial derivative of the net growth rate  $R_D$  with respect to  $S$  equal to zero and solving for  $S$ . For  $\tau > 0$ , using the equilibrium solution  $N^* = \frac{\alpha_{PC}}{\alpha_{CN}}P^*$  (Table 1B in article) when all three populations are present, this gives an ESS of  $S = 0.5$ , independent of the parameter values used:

$$\begin{aligned} \frac{\partial R_D}{\partial S} &= -\tau(1-S)^{\tau-1} \alpha_{CN}N^* + \tau S^{\tau-1} \alpha_{PC}P^* = 0 \\ \frac{1-S}{S} &= \left( \frac{\alpha_{PC}P^*}{\alpha_{CN}N^*} \right)^{\frac{1}{\tau-1}} = \left( \frac{\alpha_{PC}P^* \alpha_{CN}}{\alpha_{CN} \alpha_{PC}P^*} \right)^{\frac{1}{\tau-1}} = 1 \\ &\Rightarrow S = 0.5 \end{aligned} \quad (4)$$

The analytical solution for the ESS when the competition specialist is absent is more complicated and varies as a function of the trade-off parameter  $\tau$  and the total nutrient content  $N_T$ . Using the equilibrium solution  $N^* = \frac{\alpha_{PD}P^* + \delta_D}{\alpha_{DN}}$  (Table 1B in article) when C is absent, we get:

$$\frac{1-S}{S} = \left( \frac{\alpha_{PC}P^*}{\alpha_{CN}N^*} \right)^{\frac{1}{\tau-1}} = \left[ \frac{\alpha_{PC}}{\alpha_{CN}} P^* \frac{\alpha_{DN}}{\alpha_{PD}P^* + \delta_D} \right]^{\frac{1}{\tau-1}}$$

$$\Rightarrow S = \frac{1}{\left[ \frac{\alpha_{PC}}{\alpha_{CN}} P^* \frac{\alpha_{DN}}{\alpha_{PD} P^* + \delta_D} \right]^{\frac{1}{\tau-1}} + 1} \quad (5)$$

where  $P^* = \frac{1}{1 + \alpha_{PD}/\alpha_{DN}} \left( N_T - \frac{\delta_P}{Y_P \alpha_{PD}} - \frac{\delta_D}{\alpha_{DN}} \right)$  (from Table 1B in article).

The ESS is thus found numerically instead by solving the first partial derivative of  $R_D$  with respect to  $S$  as a function of  $S$  for different trade-off parameters and total nutrient contents. Extracting the  $S$ -value for which the partial derivative equals zero gives the ESS. The second partial derivative with respect to  $S$  was calculated and found to be negative, verifying that the extremum where the first partial derivative equals zero is a local maximum. Graphically, this procedure is illustrated in Figure S1. Figure 5 in the article shows the ESS in red as a function of the trade-off parameter  $\tau$  and different total nutrient contents  $N_T$ .
